# Supplementary material
Source: publisher figshare collection journal article supplement (https://karger.figshare.com/ndownloader/files/28904523)
Supplement: Supplementary file 1 [file 28904523]

***Supplementary Material***

***FISH-based Karyotype Analyses of Four Dracaena Species***

Hongyou Zhaoa,b,c, Shuang Lib,c, Chunyong Yangb,c, Ge Lib,c, Yanfang Wangb,c, Jianming Pengb,c, Zhen Yanb,c, Rongying Lib,c, Yanqian Wangb,c, Lixia Zhangb,c

a College of Pharmaceutical Science, Yunnan University of Chinese Medicine, Kunming, China

b Yunnan Branch, Institute of Medicinal Plant Development, Chinese Academy of Medical Sciences & Peking Union Medical College, Jinghong, China

c Yunnan Key Laboratory of Southern Medicinal Resources, Jinghong, Yunnan, China

Corresponding Authors:

Yanqian Wang and Lixia Zhang

Yunnan Branch, Institute of Medicinal Plant Development

Chinese Academy of Medical Sciences & Peking Union Medical College

Xuanwei Road 138

Jinghong, Yunnan, 666100, China

Tel: +86 15887608706

E-mail: [yanqwang@implad.ac.cn](mailto:yanqwang@implad.ac.cn,), [lxzhang@implad.ac.cn](mailto:lxzhang@implad.ac.cn)


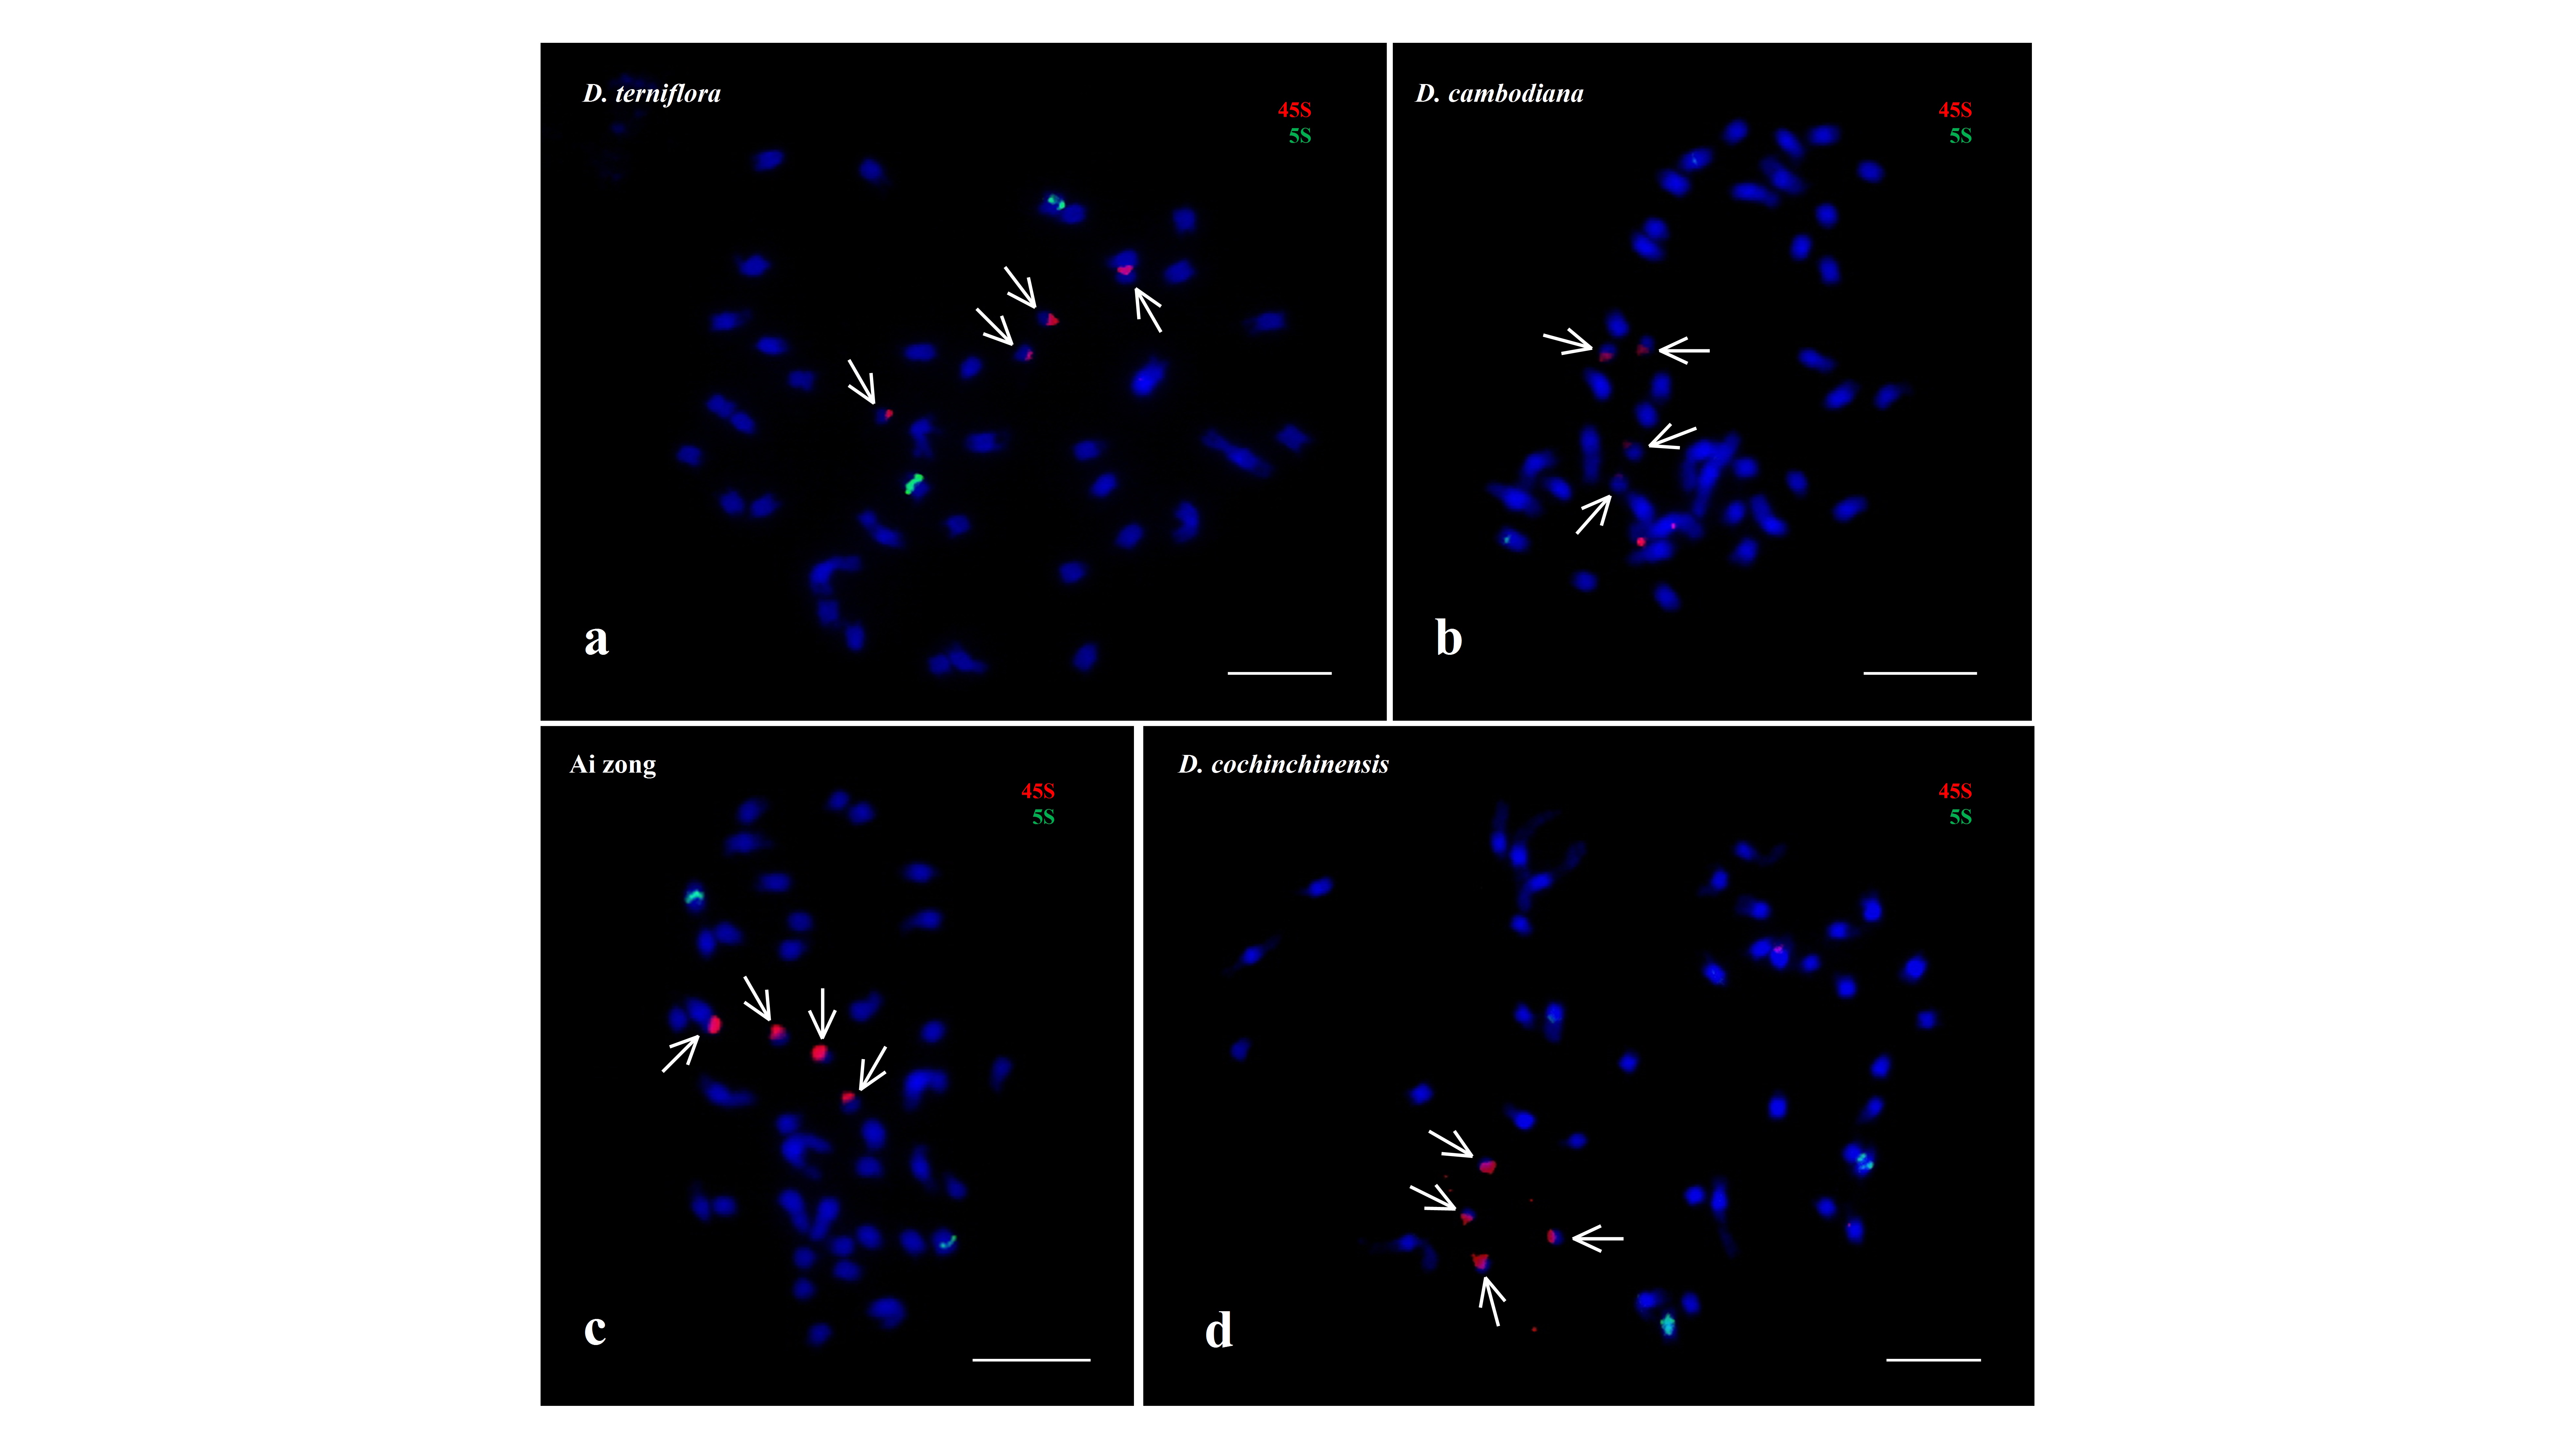


Fig. S1. Broken chromosomes of the four indicated *Dracaena* species (arrows). Green, 5S; red, 45S. Scale bar = 5 μm.
